# Supplementary material for: Deciphering Bacterial Community Structure, Functional Prediction and Food Safety Assessment in Fermented Fruits Using Next-Generation 16S rRNA Amplicon Sequencing
Source: MDPI journal article supplement (doi:10.3390/microorganisms9081574), 2021-07-23
Supplement: s1 [file s1]

Supplementary tables

Supplementary Table S1. The PCR conditions for the identification of suspected pathogens

| Pathogens                                 | Target gene                                              | Size                        | Sequence (5' to 3')                                                                                                                                                                                                                                                                                                                            | Reaction Materials<br>Final Volume: 25 ul                                                                          | PCR Condition                                                                                                                                                   | Reference |
|-------------------------------------------|----------------------------------------------------------|-----------------------------|------------------------------------------------------------------------------------------------------------------------------------------------------------------------------------------------------------------------------------------------------------------------------------------------------------------------------------------------|--------------------------------------------------------------------------------------------------------------------|-----------------------------------------------------------------------------------------------------------------------------------------------------------------|-----------|
| <i>Acinetobacter bau-<br/>mannii</i>      | ITS region                                               | 208                         | p-Ab-ITSF: 5'-CATTATCACGGTAATTAGTG-3'<br>p-AbI-TSB: 5'-AGAGCACTGTGCACTTAAG-3'                                                                                                                                                                                                                                                                  | DNA: 300 ng<br>Primer: 400 nM<br>Master mix: 5 ul                                                                  | Pre-denaturation: 94°C 5 min<br>Denaturation: 94°C 30s<br>Annealing: 55°C 30s<br>Extension: 72°C 30s<br>D.A.E. Cycles: 30 cycles<br>Final extension: 72°C 7 min | [1]       |
| <i>Bacillus cereus sensu<br/>lato s.l</i> | <i>Bal</i>                                               | 533                         | BalF: 5'-TGCAACTGTATTAGCACAAGCT-3'<br>BalR: 5'-TACCACGAAGTTTGTTCACTACT-3'                                                                                                                                                                                                                                                                      | DNA: 100-300 ng<br>Primer: 400 nM<br>Master mix: 5 ul                                                              | Pre-denaturation: 95°C 5 min<br>Denaturation: 94°C 45s<br>Annealing: 55°C 45s<br>Extension: 72°C 45s<br>D.A.E. Cycles: 30 cycles<br>Final extension: 72°C 5 min | [2]       |
| <i>Clostridium difficile</i>              | <i>tcdA</i><br><i>tcdB</i><br><i>cdtA</i><br><i>cdtB</i> | 632,<br>441,<br>260,<br>179 | tcdA-F 5'-GTATGGATAGGTGGAGAAGTCAGTG-3'<br>tcdA-R 5'-CGGTCTAGTCCAATAGAGCTAGGTC-3'<br>tcdB-F 5'-GAAGATTTAGGAAATGAAGAAGGTGA-3'<br>tcdB-R 5'-AACCACTATATTCAACTGCTTGTCC-3'<br>cdtA-F 5'-ATGCACAAGACTTACAAAGCTATAGTG-3'<br>cdtA-R 5'-CGAGAATTTGCTTCTATTTGATAATC-3'<br>cdtB-F 5'-ATTGGCAATAATCTATCTCCTGGA-3'<br>cdtB-R 5'-CCAAAATTTCCACTTACTTGTGTG-3' | DNA: 100 ng<br>Primer: 25 nM tcdA<br>FR,<br>10 nM tcdB FR,<br>200 nM,cdtA FR<br>500 nM,cdtB FR<br>Master mix: 5 ul | Pre-denaturation: 93°C 2 min<br>Denaturation: 93°C 20s<br>Annealing: 60°C 65s<br>Extension: 68°C 70s<br>D.A.E. Cycles: 30 cycles<br>Final extension: 68°C 5 min | [3]       |

|                                     |             |     |                                                                           |                                                   |                                                                                                                                                                  |     |
|-------------------------------------|-------------|-----|---------------------------------------------------------------------------|---------------------------------------------------|------------------------------------------------------------------------------------------------------------------------------------------------------------------|-----|
| <i>Klebsie pneumoniae</i>           | <i>tyrB</i> | 931 | tyrB-F: 5'-GGCTGTACTACAACGATGAC-3'<br>tyrB-R: 3'-TTGAGCAGGTAATCCACTTTG-3' | DNA: 300 ng<br>Primer: 500 nM<br>Master mix: 5 ul | Pre-denaturation: 95°C 5 min<br>Denaturation: 95°C 60s<br>Annealing: 55°C 60s<br>Extension: 72°C 60s<br>D.A.E. Cycles: 35 cycles<br>Final extension: 72°C 10 min | [4] |
| <i>Staphylococcus aureus</i>        | <i>nuc</i>  | 270 | nuc-F 5'-GCGATTGATGGTGATACGGTT-3'<br>nuc-R 5'-AGCCAAGCCTTGACGAACTAAAGC-3' | DNA: 300 ng<br>Primer: 400 nM<br>Master mix: 5 ul | Pre-denaturation: 95°C 5 min<br>Denaturation: 94°C 60s<br>Annealing: 55°C 60s<br>Extension: 72°C 60s<br>D.A.E. Cycles: 30 cycles<br>Final extension: 72°C 10 min | [5] |
| <i>Pseudomonas aeru-<br/>ginosa</i> | 16S rRNA    | 956 | PA-SS-F: 5'-GGGGGATCTTCGGACCTCA-3'<br>PA-SS-R: 5'-TCCTTAGAGTGCCCCACCCG-3' | DNA: 300 ng<br>Primer: 400 nM<br>Master mix: 5 ul | Pre-denaturation: 95°C 2 min<br>Denaturation: 94°C 20s<br>Annealing: 58°C 20s<br>Extension: 72°C 40s<br>D.A.E. Cycles: 25 cycles<br>Final extension: 72°C 4 min  | [6] |

|                                         |                      |     |                                                                  |                                                   |                                                                                                                                                                  |     |
|-----------------------------------------|----------------------|-----|------------------------------------------------------------------|---------------------------------------------------|------------------------------------------------------------------------------------------------------------------------------------------------------------------|-----|
| <i>Streptococcus pneumoniae</i>         | <i>pneumolysin</i>   | 75  | F 5'-AGCGATAGCTTTCTCCAAGTGG-3'<br>R 5'-CTTAGCCAACAAATCGTTACCG-3' | DNA: 300 ng<br>Primer: 400 nM<br>Master mix: 5 ul | Pre-denaturation: 94°C 5 min<br>Denaturation: 94°C 45s<br>Annealing: 50°C 90s<br>Extension: 72°C 90s<br>D.A.E. Cycles: 35 cycles<br>Final extension: 72°C 10 min | [7] |
| <i>nontuberculous mycobacteria, NTM</i> | 16s rRNA<br>23S rRNA |     | Real-Q MTB & NTM Kit                                             | DNA: 300 ng<br>Primer: 400 nM<br>Master mix: 5 ul | Pre-denaturation: 95°C 10 min<br>Denaturation: 95°C 15s<br>Annealing & Extension: 67°C 45s<br>D.A.E. Cycles: 45 cycles                                           | [8] |
| <i>Stenotrophomonas maltophilia</i>     | 23S rRNA             | 278 | F 5'GCTGGATTGGTTCTAGGAAAACGC3'<br>R 5'ACGCAGTCACTCCTTGCG3'       | DNA: 300 ng<br>Primer: 400 nM<br>Master mix: 5 ul | Pre-denaturation: 94°C 5 min<br>Denaturation: 94°C 45s<br>Annealing: 68°C 45s<br>Extension: 72°C 45s<br>D.A.E. Cycles: 35 cycles<br>Final extension: 72°C 10 min | [7] |

|                                     |                 |     |                                                                                |                                                   |                                                                                                                                                                  |      |
|-------------------------------------|-----------------|-----|--------------------------------------------------------------------------------|---------------------------------------------------|------------------------------------------------------------------------------------------------------------------------------------------------------------------|------|
| <i>Gardmerella vaginalis</i>        | 16S rRNA        |     | F- GV1 5'-TTACTGGTGTATCACTGTAAGG-3'<br>R- GV3 5'-CCGTCACAGGCTGAACAGT-3'        | DNA: 300 ng<br>Primer: 400 nM<br>Master mix: 5 ul | Pre-denaturation: 94°C 5 min<br>Denaturation: 94°C 45s<br>Annealing: 55°C 45s<br>Extension: 72°C 45s<br>D.A.E. Cycles: 35 cycles<br>Final extension: 72°C 10 min | [9]  |
| <i>Chryseobacterium indologenes</i> | 6S-23S rRNA ISR | 561 | Chry-16S-F 5'-GCATCAGCCATGGCGCGGTG-3'<br>Chry-23S-R 5'-CCTTAACGATTTCTTTCCTA-3' | DNA: 300 ng<br>Primer: 400 nM<br>Master mix: 5 ul | Pre-denaturation: 94°C 5 min<br>Denaturation: 94°C 45s<br>Annealing: 55°C 45s<br>Extension: 72°C 45s<br>D.A.E. Cycles: 35 cycles<br>Final extension: 72°C 10 min | [10] |

**Supplementary Table S2.** Chemical analysis of fermented fruits from the 2<sup>nd</sup> stage of fermentation and final products

| Process | Samples             | pH <sup>1</sup> | °Brix <sup>2</sup> (%) | Organic acid <sup>3</sup> (%) | Ethanol <sup>4</sup> (%) | Measurement time      |
|---------|---------------------|-----------------|------------------------|-------------------------------|--------------------------|-----------------------|
|         | Ch1_2 <sup>nd</sup> | 3.2             | 24.0                   | 3.8                           | 0.0                      | 1 <sup>st</sup> month |
|         | Ch2_2 <sup>nd</sup> | 3.2             | 23.3                   | 3.6                           | 0.0                      |                       |
|         | Ch3_2 <sup>nd</sup> | 3.4             | 22.5                   | 3.4                           | 0.0                      |                       |
|         | Ch1_2 <sup>nd</sup> | 3.2             | 23.6                   | 4.1                           | 0.0                      | 2 <sup>nd</sup> month |
|         | Ch2_2 <sup>nd</sup> | 3.4             | 23.2                   | 3.7                           | 0.0                      |                       |
|         | Ch3_2 <sup>nd</sup> | 3.3             | 22.2                   | 3.5                           | 0.0                      |                       |

|                                       |                     |     |      |     |     |                       |
|---------------------------------------|---------------------|-----|------|-----|-----|-----------------------|
| 2 <sup>nd</sup> stage of fermentation | Ch1_2 <sup>nd</sup> | 3.3 | 23.8 | 3.8 | 0.0 | 3 <sup>rd</sup> month |
|                                       | Ch2_2 <sup>nd</sup> | 3.4 | 23.2 | 3.6 | 2.2 |                       |
|                                       | Ch3_2 <sup>nd</sup> | 3.4 | 22.2 | 3.4 | 2.4 |                       |
|                                       | Ch1_2 <sup>nd</sup> | 3.3 | 23.6 | 4.3 | 0.0 | 4 <sup>th</sup> month |
|                                       | Ch2_2 <sup>nd</sup> | 3.4 | 23.2 | 4.1 | 0.0 |                       |
|                                       | Ch3_2 <sup>nd</sup> | 3.4 | 22.2 | 3.8 | 0.7 |                       |
|                                       | Ch1_2 <sup>nd</sup> | 3.3 | 23.2 | 4.4 | 0.0 | 5 <sup>th</sup> month |
|                                       | Ch2_2 <sup>nd</sup> | 3.2 | 23.0 | 4.0 | 0.0 |                       |
|                                       | Ch3_2 <sup>nd</sup> | 3.3 | 22.0 | 4.0 | 0.0 |                       |
|                                       | Ch1_2 <sup>nd</sup> | 3.2 | 23.4 | 4.3 | 0.0 | 6 <sup>th</sup> month |
|                                       | Ch2_2 <sup>nd</sup> | 3.3 | 23.0 | 4.0 | 1.7 |                       |
|                                       | Ch3_2 <sup>nd</sup> | 3.3 | 22.0 | 3.9 | 1.4 |                       |
| Product                               | Ch1_2 <sup>nd</sup> | 3.2 | 23.4 | 4.3 | 0.0 | 7 <sup>th</sup> month |
|                                       | Ch2_2 <sup>nd</sup> | 3.3 | 23.0 | 4.1 | 1.1 |                       |
|                                       | Ch3_2 <sup>nd</sup> | 3.3 | 22.0 | 4.0 | 0.0 |                       |
|                                       | Ch1_2 <sup>nd</sup> | 3.2 | 22.8 | 4.5 | 0.0 | 8 <sup>th</sup> month |
|                                       | Ch2_2 <sup>nd</sup> | 3.3 | 23.0 | 4.0 | 0.0 |                       |
|                                       | Ch3_2 <sup>nd</sup> | 3.3 | 22.0 | 3.9 | 1.7 |                       |
|                                       | Pr1_F               | 2.8 | 10.8 | 5.8 | 2.8 | 0 day                 |
|                                       | Pr2_F               | 2.6 | 11.0 | 5.8 | 2.7 |                       |
|                                       | Pr3_F               | 2.7 | 11.2 | 5.9 | 2.7 |                       |

<sup>1</sup> The pH of samples is measured using a DO Microelectronic pH-Vision pH meter (model PHB-9901, Ai-On Industrial Corp., Taipei, Taiwan).

<sup>2</sup> °Brix (Brix) was measured using Brix meter (Lotus, China) following the manufacturer protocol. Brix is mainly made up of sugars but also includes other compounds.

<sup>3</sup> Organic acids content was measured using the principle of acid-base neutralization titration of volumetric analysis. In brief, a 2 ml sample was taken in a beaker with the addition of distilled water to 20 ml (10 times dilution) and titrated with 0.1N NaOH standard solution. The initial and end of titration was recoded and finally, the below formula was used to determine the organic acid contents.

The amount of organic acid in fermented food (%) = (S-B) \* F \* O.A \* D.F / Swt \*100

S: The sample test consumed the number of 0.1N NaOH mL

B: The number of 0.1N NaOH mL consumed in the blank test

F: The titer of 0.1N NaOH (acceptable range: 0.9~1.1)

O.A: Organic acid (citric acid based: 0.0064)

D.F: Dilution factor

Swt: sample weight (mL)

Additionally, the manufacture company also uses Agilent Hi-Plex H column with UV detection to separate, identify, and estimate organic acids, including oxalic acid, citric acid, tartaric acid, malic acid, succinic acid, formic acid, and fumaric acid, when they need to show the product quality report.

<sup>4</sup> Ethanol contents were measured using ethyl alcohol Meter (Ethyl alcohol meter PAL-33S, Atago Co., LTD.) following the manufacture protocol.

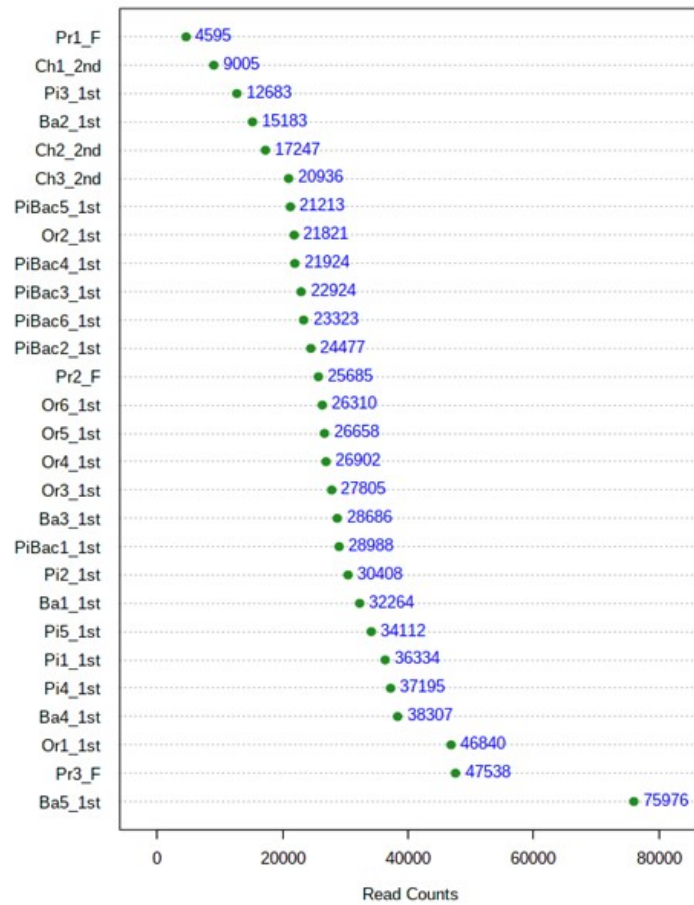

A

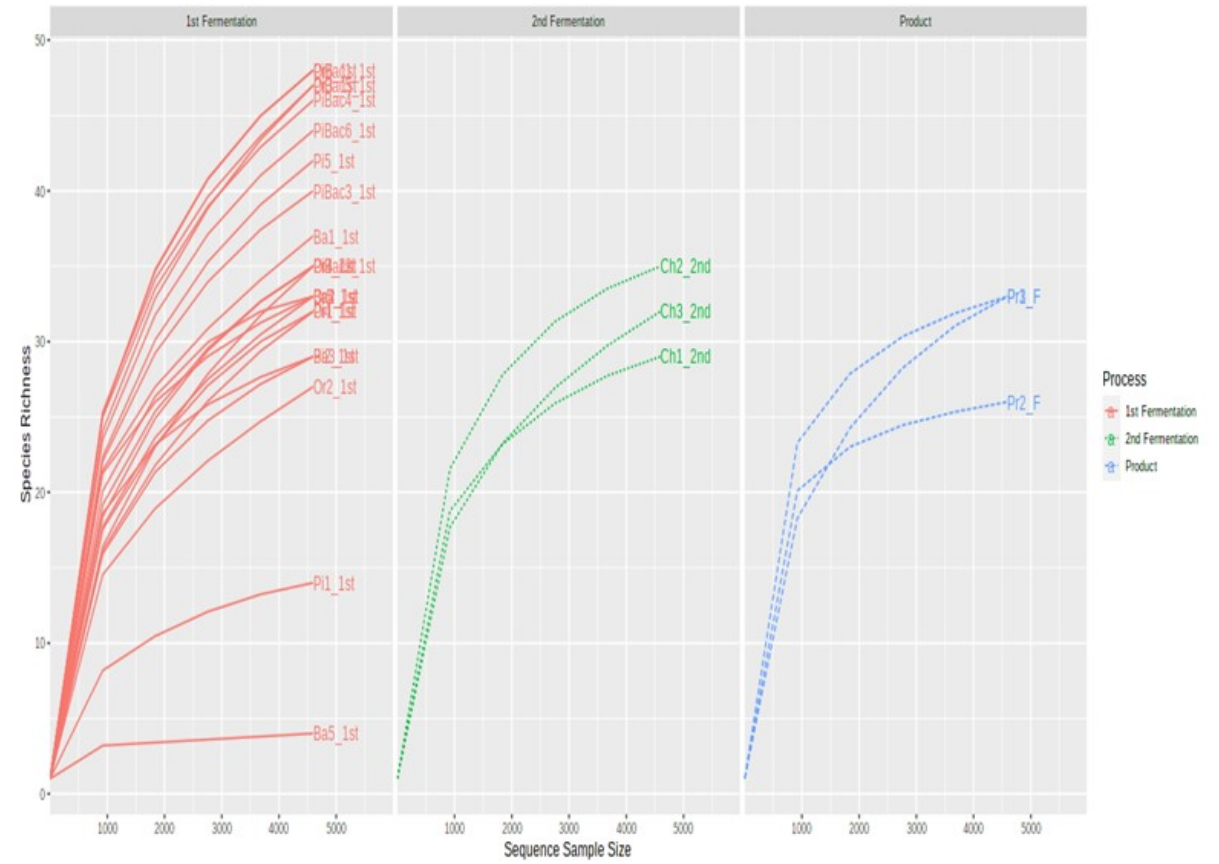

B

**Supplementary Figure S1.** Library size overview (A) and alpha rarefaction plot (B) among the fermentation stages and the final products.

**Supplementary Table S3.** The sequence good's coverage at the minimum sequence depth associated with the fermented samples

| samples         | no. se-<br>quence | goods    |
|-----------------|-------------------|----------|
| Pr1_F           | 4595              | 99.89119 |
| Pr2_F           | 4595              | 99.93471 |
| Pr3_F           | 4595              | 99.8259  |
| Or1_1st         | 4595              | 99.8259  |
| Or2_1st         | 4595              | 99.76061 |
| Or3_1st         | 4595              | 99.6518  |
| Pi-<br>Bac1_1st | 4595              | 99.71708 |
| Pi-<br>Bac2_1st | 4595              | 99.67356 |
| Pi-<br>Bac3_1st | 4595              | 99.76061 |
| Pi1_1st         | 4595              | 99.93471 |
| Pi2_1st         | 4595              | 99.8259  |
| Ba1_1st         | 4595              | 99.69532 |
| Ba2_1st         | 4595              | 99.8259  |
| Ba3_1st         | 4595              | 99.86942 |
| Ch1_2nd         | 4595              | 99.89119 |
| Ch2_2nd         | 4595              | 99.86942 |
| Ch3_2nd         | 4595              | 99.78237 |
| Or4_1st         | 4595              | 99.78237 |
| Or5_1st         | 4595              | 99.93471 |
| Or6_1st         | 4595              | 99.71708 |
| Pi-<br>Bac4_1st | 4595              | 99.69532 |

|             |      |          |
|-------------|------|----------|
| Pi-Bac5_1st | 4595 | 99.6518  |
| Pi-Bac6_1st | 4595 | 99.71708 |
| Pi3_1st     | 4595 | 99.78237 |
| Pi4_1st     | 4595 | 99.73885 |
| Pi5_1st     | 4595 | 99.71708 |
| Ba4_1st     | 4595 | 99.73885 |
| Ba5_1st     | 4595 | 99.97824 |

## References

1. Chen, T.-L.; Sin, L.-K.; Wu, R.-C.; Shaio, M.-F.; Huang, L.-Y.; Fung, C.-P.; Lee, C.-M.; Cho, W.-L. Comparison of one-tube multiplex PCR, automated ribotyping and intergenic spacer (ITS) sequencing for rapid identification of *Acinetobacter baumannii*. *Clin Microbiol Infect* **2007**, *13*, 801-806.
2. Das, S.; Surendran, P.; Thampuran, N. PCR-based detection of enterotoxigenic isolates of *Bacillus cereus* from tropical seafood. *Indian Journal of Medical Research* **2009**, *129*, 316.
3. Chankhamhaengdech, S.; Hadpanus, P.; Aroonnual, A.; Ngamwongsatit, P.; Chotiprasitsakul, D.; Chongtrakool, P.; Janvilisri, T. Evaluation of multiplex PCR with enhanced spore germination for detection of *Clostridium difficile* from stool samples of the hospitalized patients. *BioMed research international* **2013**, *2013*.
4. JEong, E.-S.; Lee, K.-S.; HEo, S.-H.; SEo, J.-H.; CHoi, Y.-K. Rapid identification of *Klebsiella pneumoniae*, *Corynebacterium kutscheri*, and *Streptococcus pneumoniae* using triplex polymerase chain reaction in rodents. *Experimental animals* **2013**, *62*, 35-40.
5. Brakstad, O.G.; Aasbakk, K.; Maeland, J.A. Detection of *Staphylococcus aureus* by polymerase chain reaction amplification of the nuc gene. *Journal of clinical microbiology* **1992**, *30*, 1654-1660.
6. Spilker, T.; Coenye, T.; Vandamme, P.; LiPuma, J.J. PCR-based assay for differentiation of *Pseudomonas aeruginosa* from other *Pseudomonas* species recovered from cystic fibrosis patients. *Journal of clinical microbiology* **2004**, *42*, 2074-2079.
7. Greiner, O.; Day, P.J.; Bosshard, P.P.; Imeri, F.; Altwegg, M.; Nadal, D. Quantitative detection of *Streptococcus pneumoniae* in nasopharyngeal secretions by real-time PCR. *Journal of clinical microbiology* **2001**, *39*, 3129-3134.
8. Kim, Y.N.; Kim, K.M.; Choi, H.N.; Lee, J.H.; Park, H.S.; Jang, K.Y.; Moon, W.S.; Kang, M.J.; Lee, D.G.; Chung, M.J. Clinical usefulness of PCR for differential diagnosis of tuberculosis and nontuberculous mycobacterial infection in paraffin-embedded lung tissues. *The Journal of Molecular Diagnostics*

**2015**, 17, 597-604.

9. Zariffard, M.R.; Saifuddin, M.; Sha, B.E.; Spear, G.T. Detection of bacterial vaginosis-related organisms by real-time PCR for Lactobacilli, Gardnerella vaginalis and Mycoplasma hominis. *FEMS Immunology & Medical Microbiology* **2002**, 34, 277-281.
10. Pridgeon, J.; Klesius, P.; Garcia, J. Identification and virulence of *Corynebacterium indologenes* isolated from diseased yellow perch (*Perca flavescens*). *Journal of applied microbiology* **2013**, 114, 636-643.
